# Supplementary material for: Stability of Nanopeptides: Structure and Molecular Exchange of Self-assembled Peptide Fibers
Source: PubMed Central journal article supplement (PMC10339792; doi:10.1021/acsnano.3c01811), 2023-06-26
Supplement: nn3c01811_si_001.pdf [file nn3c01811_si_001.pdf]

## Supplementary Information

for

### **On the Stability of Nanopeptides: Structure and Molecular Exchange of Self-assembled Peptide Fibers**

Nico König,<sup>1,2</sup> Szymon Mikolaj Szostak,<sup>1</sup> Josefine Eilsø Nielsen,<sup>1,3</sup> Martha Dunbar,<sup>4</sup> Su Yang,<sup>5</sup> Weike Chen,<sup>5</sup> Ari Benjamin,<sup>4</sup> Aurel Radulescu,<sup>6</sup> Najet Mahmoudi,<sup>7</sup> Lutz Willner,<sup>2</sup> Sinan Keten,<sup>4,8</sup> He Dong,<sup>5</sup> and Reidar Lund<sup>1,9,\*</sup>

<sup>1</sup>*Department of Chemistry, University of Oslo, P.O. Box 1033 Blindern, 0315 Oslo, Norway*

<sup>2</sup>*Jülich Centre for Neutron Science (JCNS) and Institut für Biologische Informationsprozesse (IBI),  
Forschungszentrum Jülich GmbH, 52425 Jülich, Germany*

<sup>3</sup>*Current address: Department of Bioengineering,  
Stanford University, Stanford, California 94305, United States*

<sup>4</sup>*Department of Mechanical Engineering, Northwestern University, Evanston, Illinois 60208, United States*

<sup>5</sup>*Department of Chemistry & Biochemistry, The University of Texas at Arlington, Arlington, Texas 76019, United States*

<sup>6</sup>*Jülich Centre for Neutron Science (JCNS) at Heinz Maier-Leibnitz Zentrum (MLZ),  
Forschungszentrum Jülich GmbH, 85747 Garching, Germany*

<sup>7</sup>*ISIS-STFC, Rutherford Appleton Laboratory, Chilton, Oxon OX11 0QX, United Kingdom*

<sup>8</sup>*Department of Civil and Environmental Engineering,  
Northwestern University, Evanston, Illinois 60208, United States*

<sup>9</sup>*Hylleraas Centre for Quantum Molecular Sciences, University of Oslo, Norway*

## HPLC AND MALDI-TOF CHARACTERIZATION

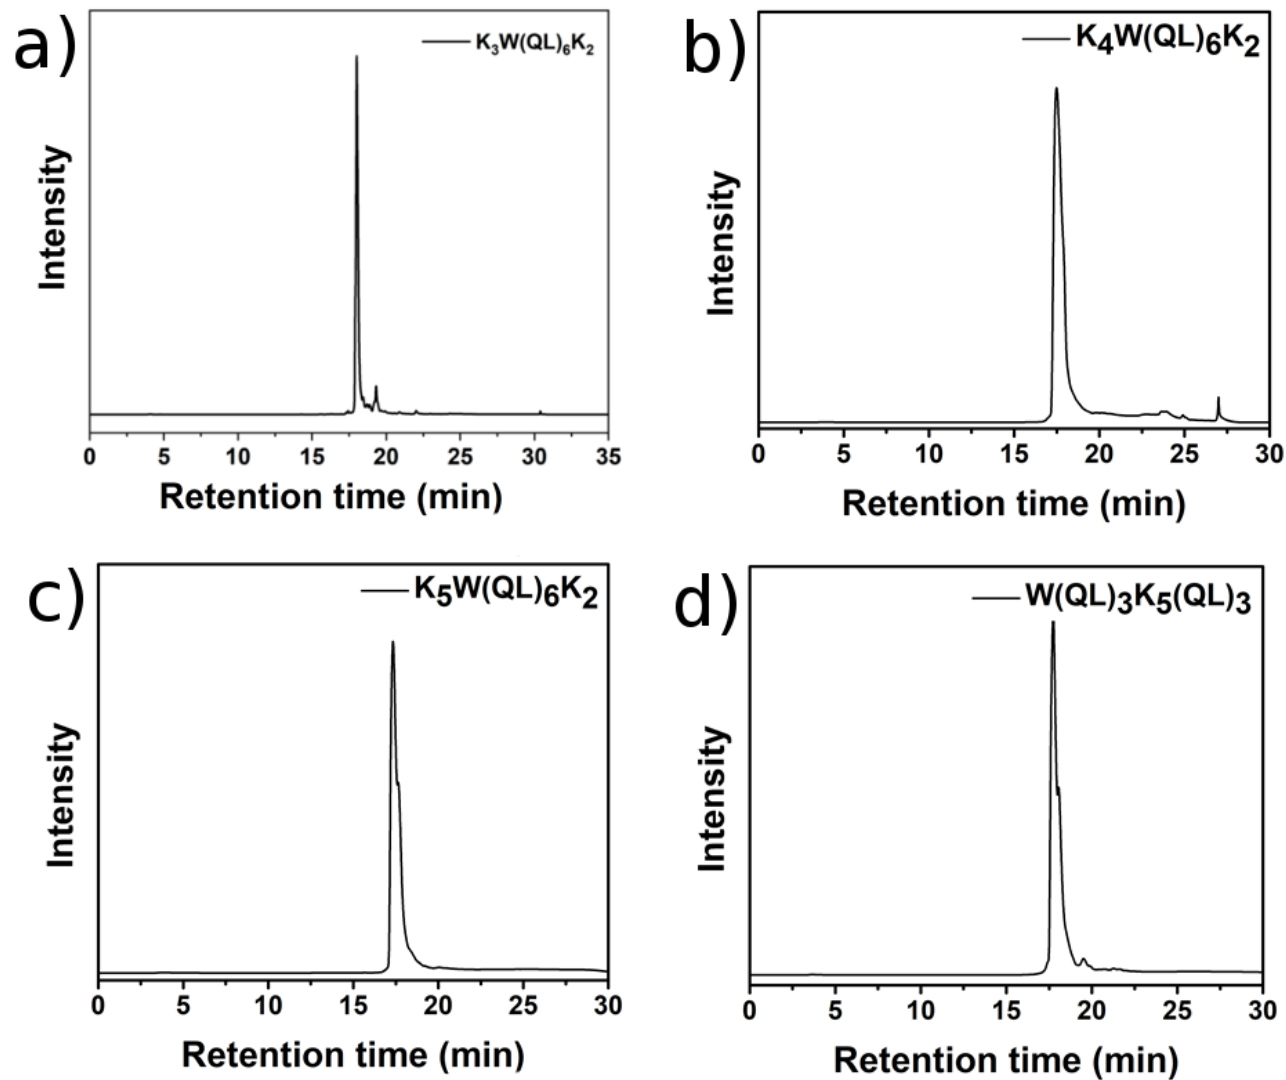

FIG. S1: a) HPLC chromatogram of  $K_3W(QL)_6K_2$ , b) HPLC chromatogram of  $K_4W(QL)_6K_2$ , c) HPLC chromatogram of  $K_5W(QL)_6K_2$ , d) HPLC chromatogram of  $W(QL)_3K_5(QL)_3$ .

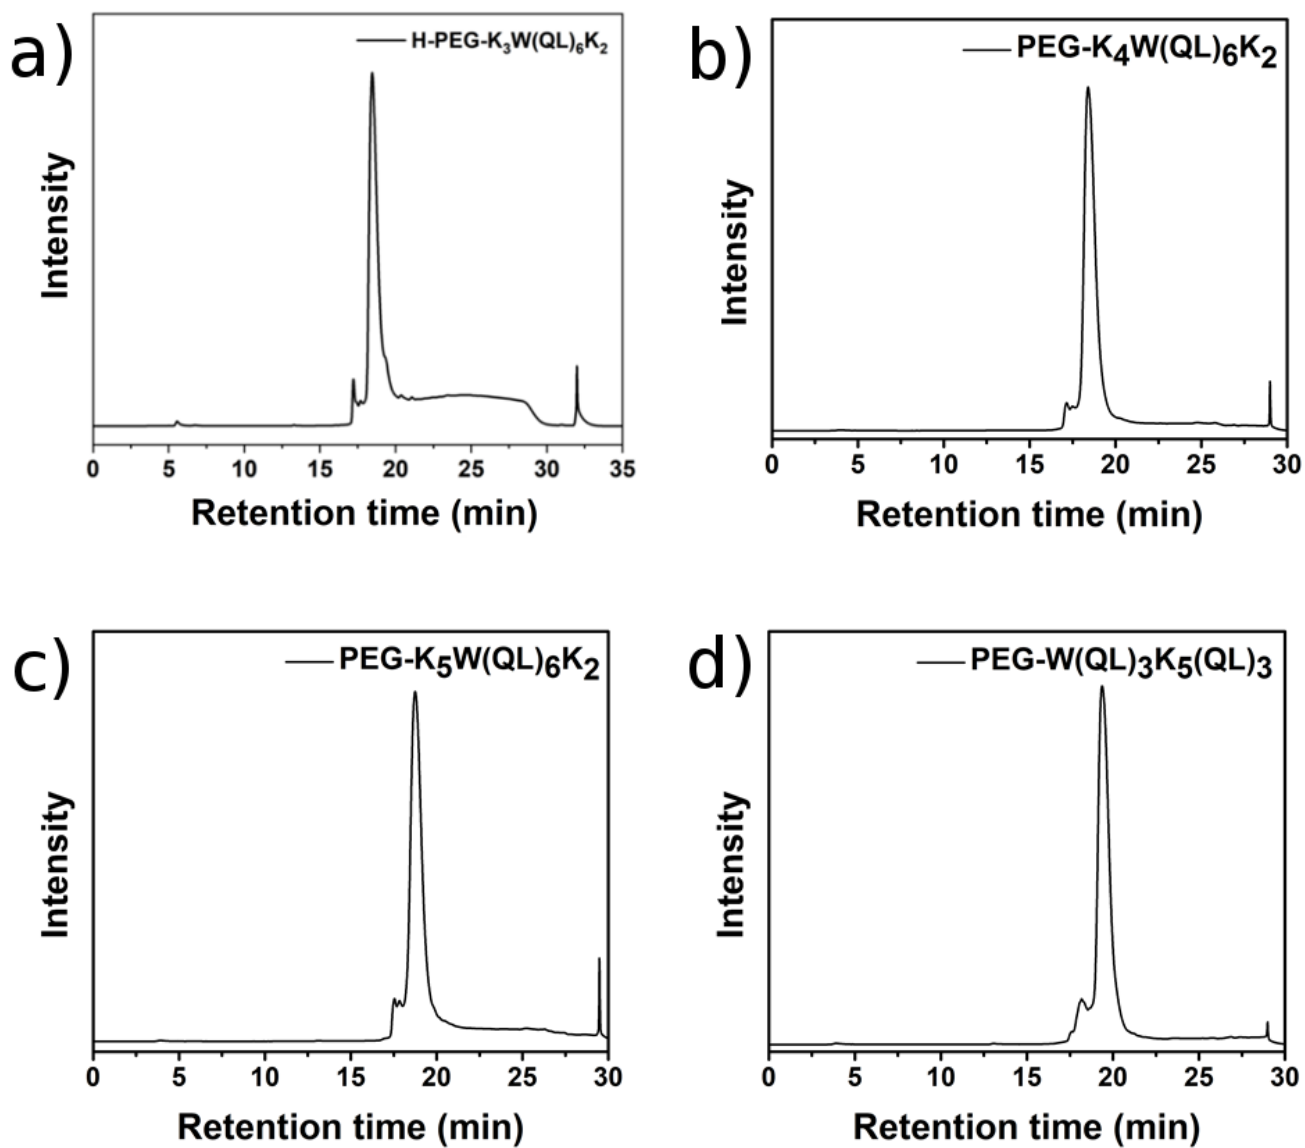

FIG. S2: a) HPLC chromatogram of PEG-K<sub>3</sub>W(QL)<sub>6</sub>K<sub>2</sub>, b) HPLC chromatogram of PEG-K<sub>4</sub>W(QL)<sub>6</sub>K<sub>2</sub>, c) HPLC chromatogram of PEG-K<sub>5</sub>W(QL)<sub>6</sub>K<sub>2</sub>, d) HPLC chromatogram of PEG-W(QL)<sub>3</sub>K<sub>5</sub>(QL)<sub>3</sub>.

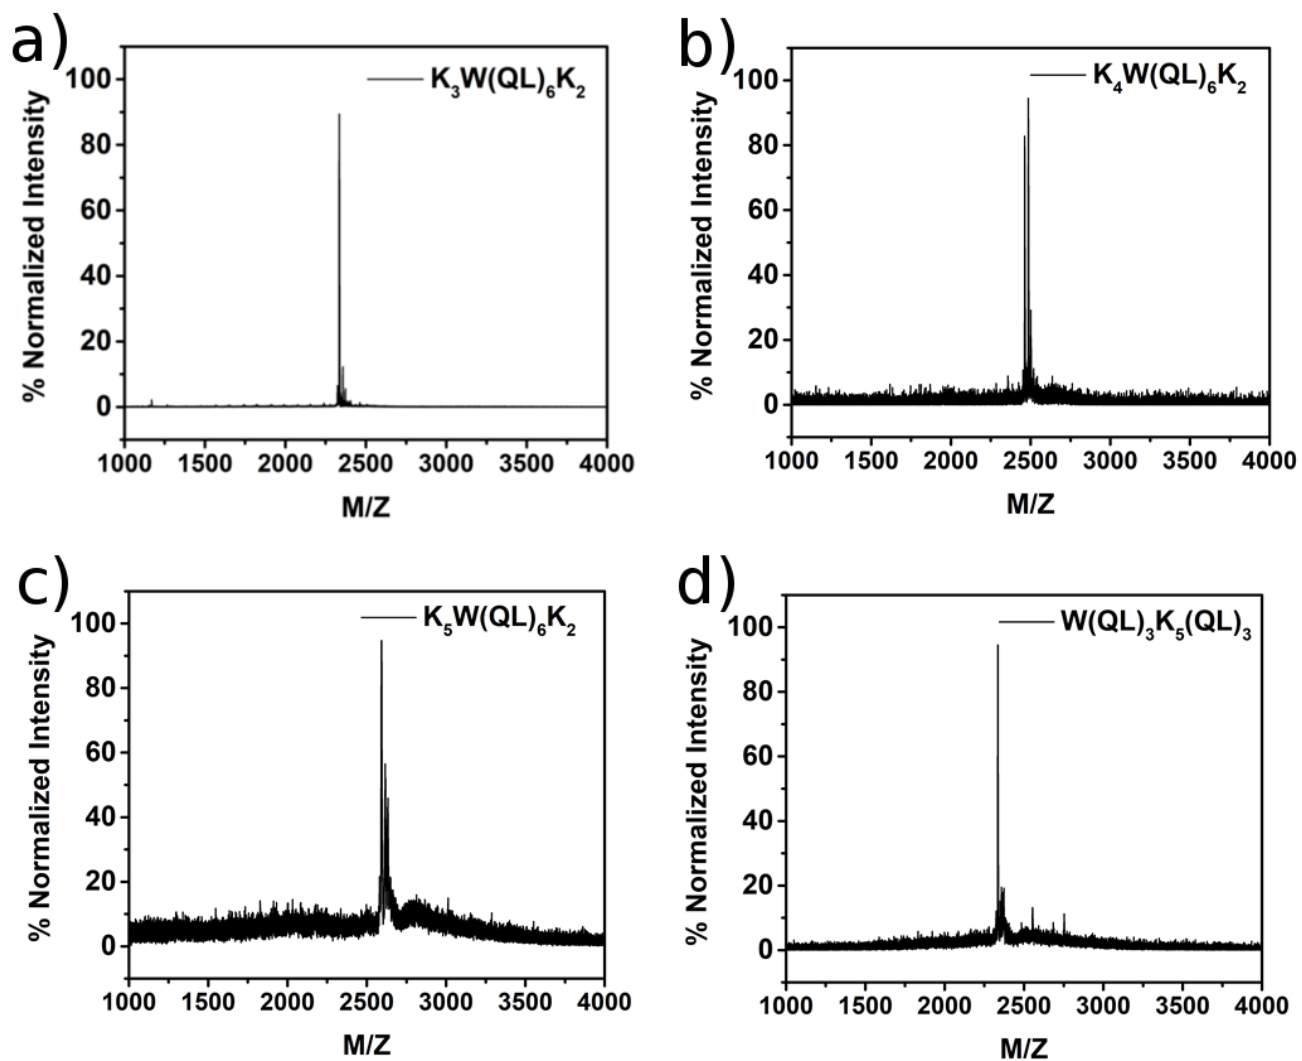

FIG. S3: a) MALDI-TOF spectrum of  $K_3W(QL)_6K_2$ , b) MALDI-TOF spectrum of  $K_4W(QL)_6K_2$ , c) MALDI-TOF spectrum of  $K_5W(QL)_6K_2$ , d) MALDI-TOF spectrum of  $W(QL)_3K_5(QL)_3$

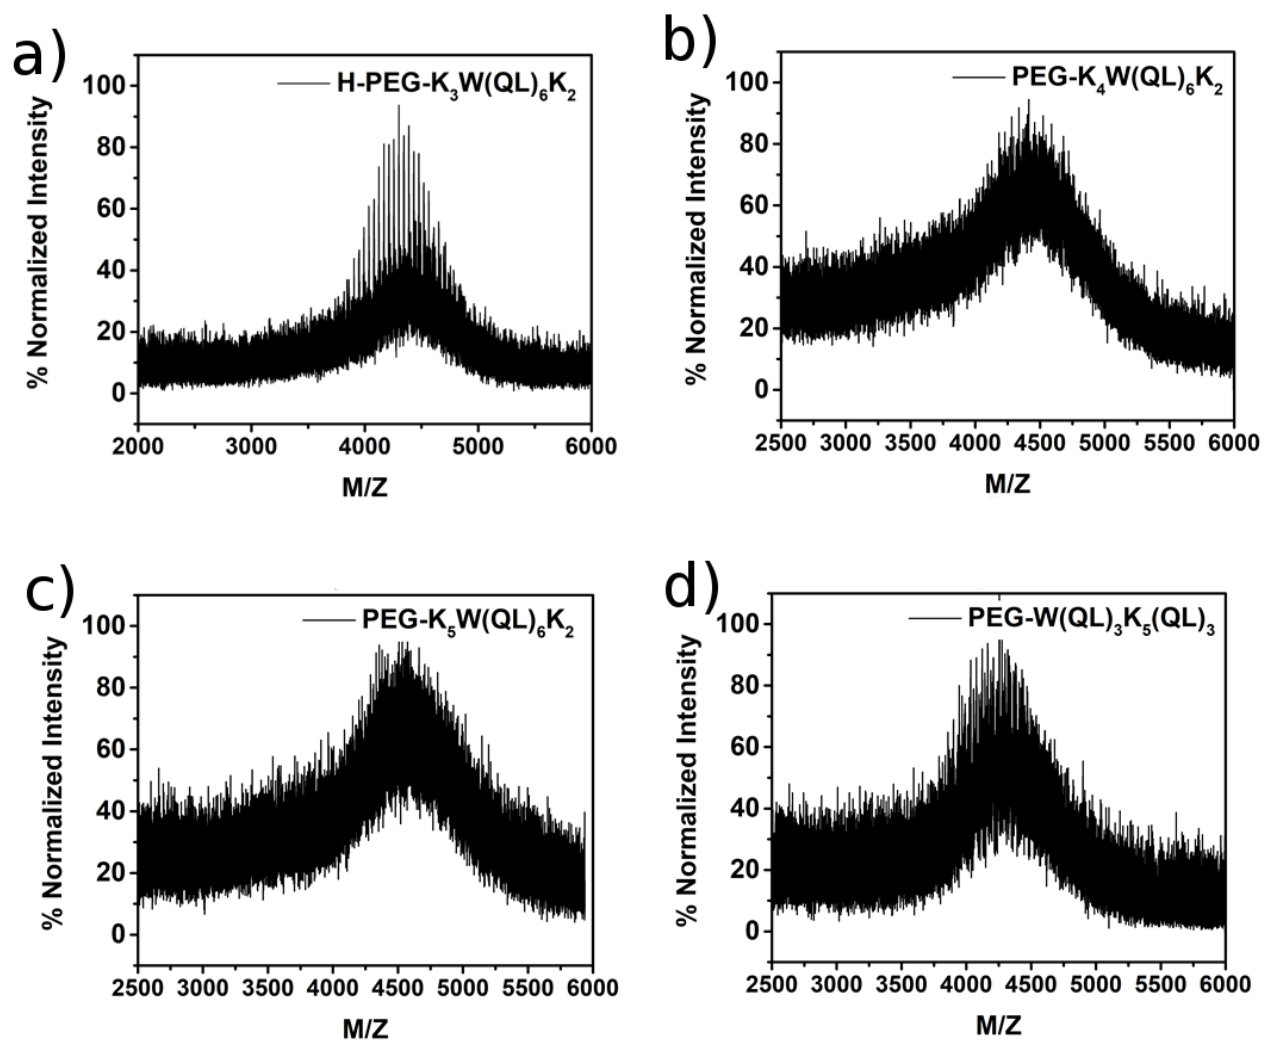

FIG. S4: a) MALDI-TOF spectrum of PEG-K<sub>3</sub>W(QL)<sub>6</sub>K<sub>2</sub>, b) MALDI-TOF spectrum of PEG-K<sub>4</sub>W(QL)<sub>6</sub>K<sub>2</sub>, c) MALDI-TOF spectrum of PEG-K<sub>5</sub>W(QL)<sub>6</sub>K<sub>2</sub>, d) MALDI-TOF spectrum of PEG-W(QL)<sub>3</sub>K<sub>5</sub>(QL)<sub>3</sub>

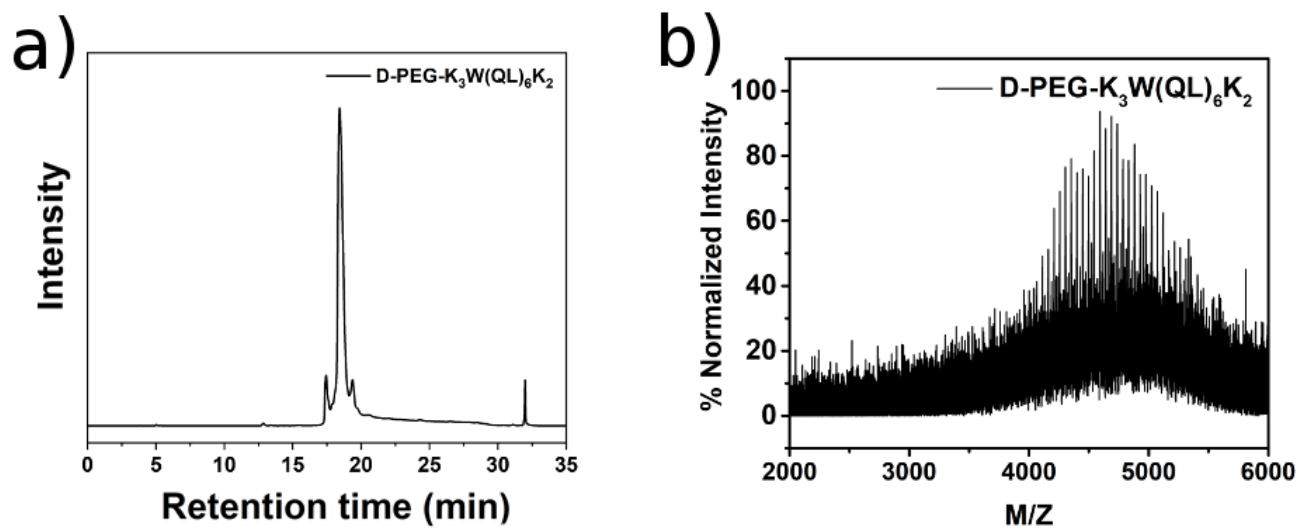

FIG. S5: a) HPLC chromatogram of  $\text{dPEG-K}_3\text{W(QL)}_6\text{K}_2$ , b) MALDI-TOF spectrum of  $\text{dPEG-K}_3\text{W(QL)}_6\text{K}_2$ .

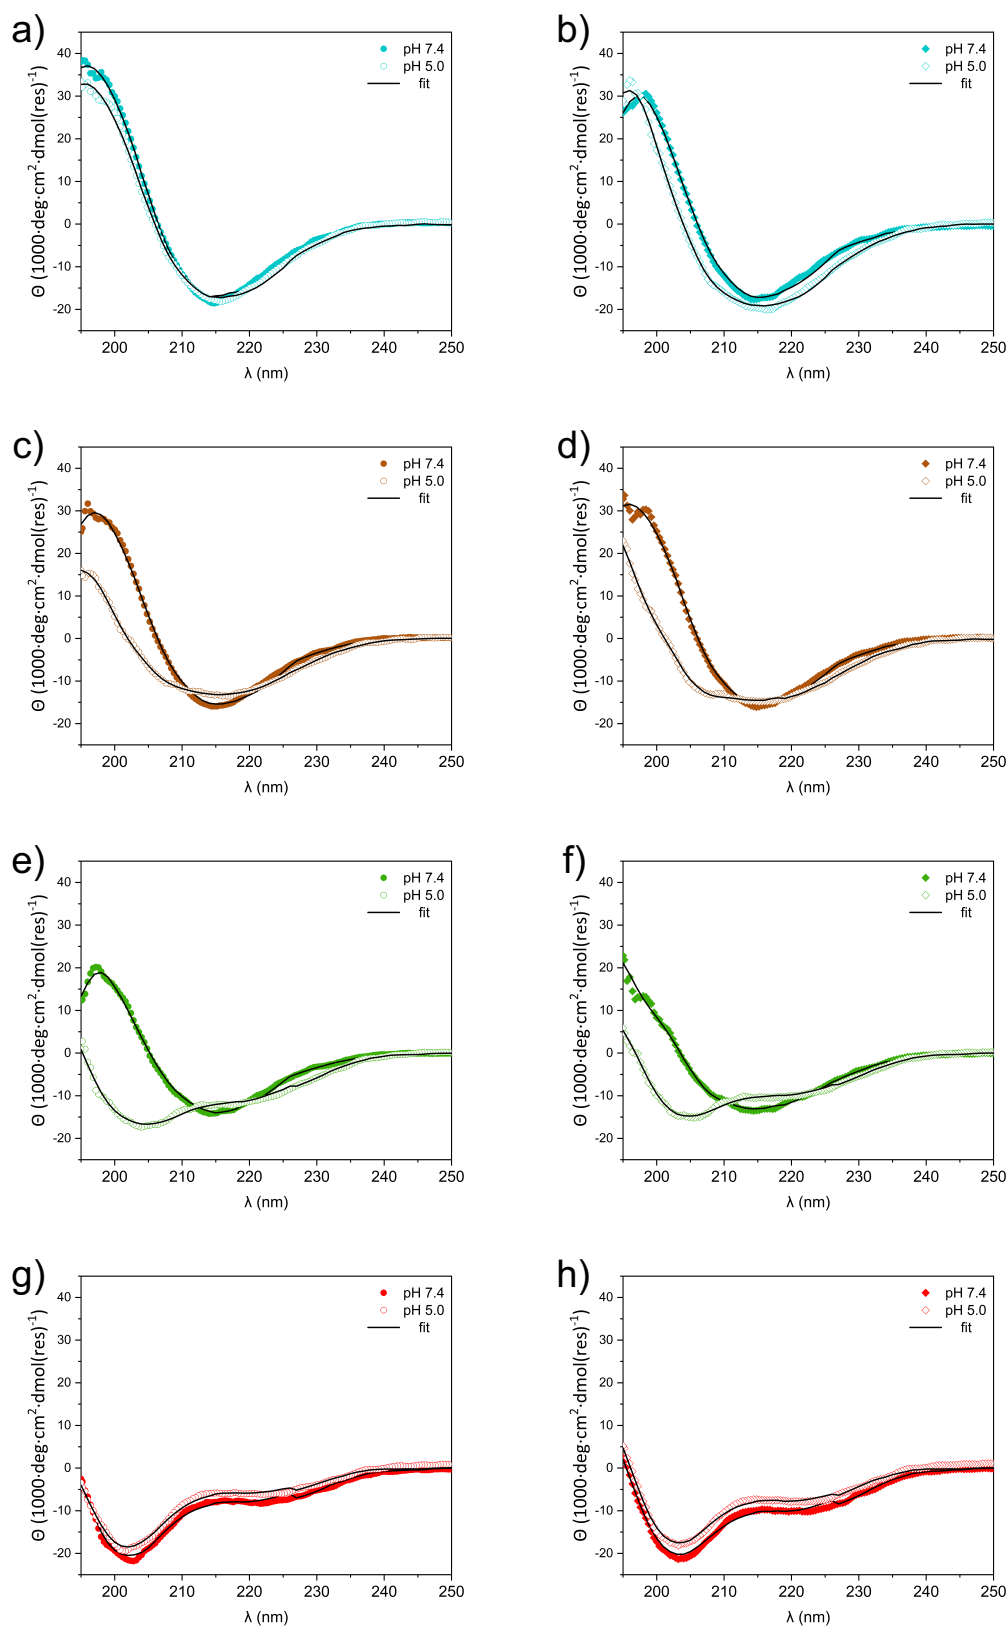

FIG. S6: CD spectra of peptide solutions at pH 7.4 and 5.0, black lines represent CD spectrum matched by BeStSel program a)  $K_3W(QL)_6K_2$ , b)  $PEG-K_3W(QL)_6K_2$ , c)  $K_4W(QL)_6K_2$ , d)  $PEG-K_4W(QL)_6K_2$ , e)  $K_5W(QL)_6K_2$ , f)  $PEG-K_5W(QL)_6K_2$ , g)  $W(QL)_3K_5(QL)_3$ , h)  $PEG-W(QL)_3K_5(QL)_3$

TABLE S1: Summary of the estimated secondary structure content in the peptide nanostructures, determined by BeStSel program and represented in Figure S6

| Peptide                                                 |          | Estimated secondary structure content [%] |                |       |
|---------------------------------------------------------|----------|-------------------------------------------|----------------|-------|
|                                                         |          | $\alpha$ -helix                           | $\beta$ -sheet | Other |
| K <sub>3</sub> W(QL) <sub>6</sub> K <sub>2</sub>        | pH = 7.4 | 18                                        | 69             | 13    |
|                                                         | pH = 5.0 | 21                                        | 66             | 13    |
| K <sub>4</sub> W(QL) <sub>6</sub> K <sub>2</sub>        | pH = 7.4 | 18                                        | 54             | 28    |
|                                                         | pH = 5.0 | 21                                        | 29             | 50    |
| K <sub>5</sub> W(QL) <sub>6</sub> K <sub>2</sub>        | pH = 7.4 | 19                                        | 31             | 50    |
|                                                         | pH = 5.0 | 20                                        | 22             | 58    |
| W(QL) <sub>3</sub> K <sub>5</sub> (QL) <sub>3</sub>     | pH = 7.4 | 12                                        | 20             | 68    |
|                                                         | pH = 5.0 | 10                                        | 18             | 72    |
| PEG-K <sub>3</sub> W(QL) <sub>6</sub> K <sub>2</sub>    | pH = 7.4 | 16                                        | 44             | 40    |
|                                                         | pH = 5.0 | 31                                        | 27             | 42    |
| PEG-K <sub>4</sub> W(QL) <sub>6</sub> K <sub>2</sub>    | pH = 7.4 | 15                                        | 67             | 18    |
|                                                         | pH = 5.0 | 20                                        | 48             | 32    |
| PEG-K <sub>5</sub> W(QL) <sub>6</sub> K <sub>2</sub>    | pH = 7.4 | 12                                        | 61             | 27    |
|                                                         | pH = 5.0 | 20                                        | 15             | 65    |
| PEG-W(QL) <sub>3</sub> K <sub>5</sub> (QL) <sub>3</sub> | pH = 7.4 | 19                                        | 16             | 65    |
|                                                         | pH = 5.0 | 17                                        | 16             | 67    |



## TEMPERATURE STABILITY OF PEPTIDES

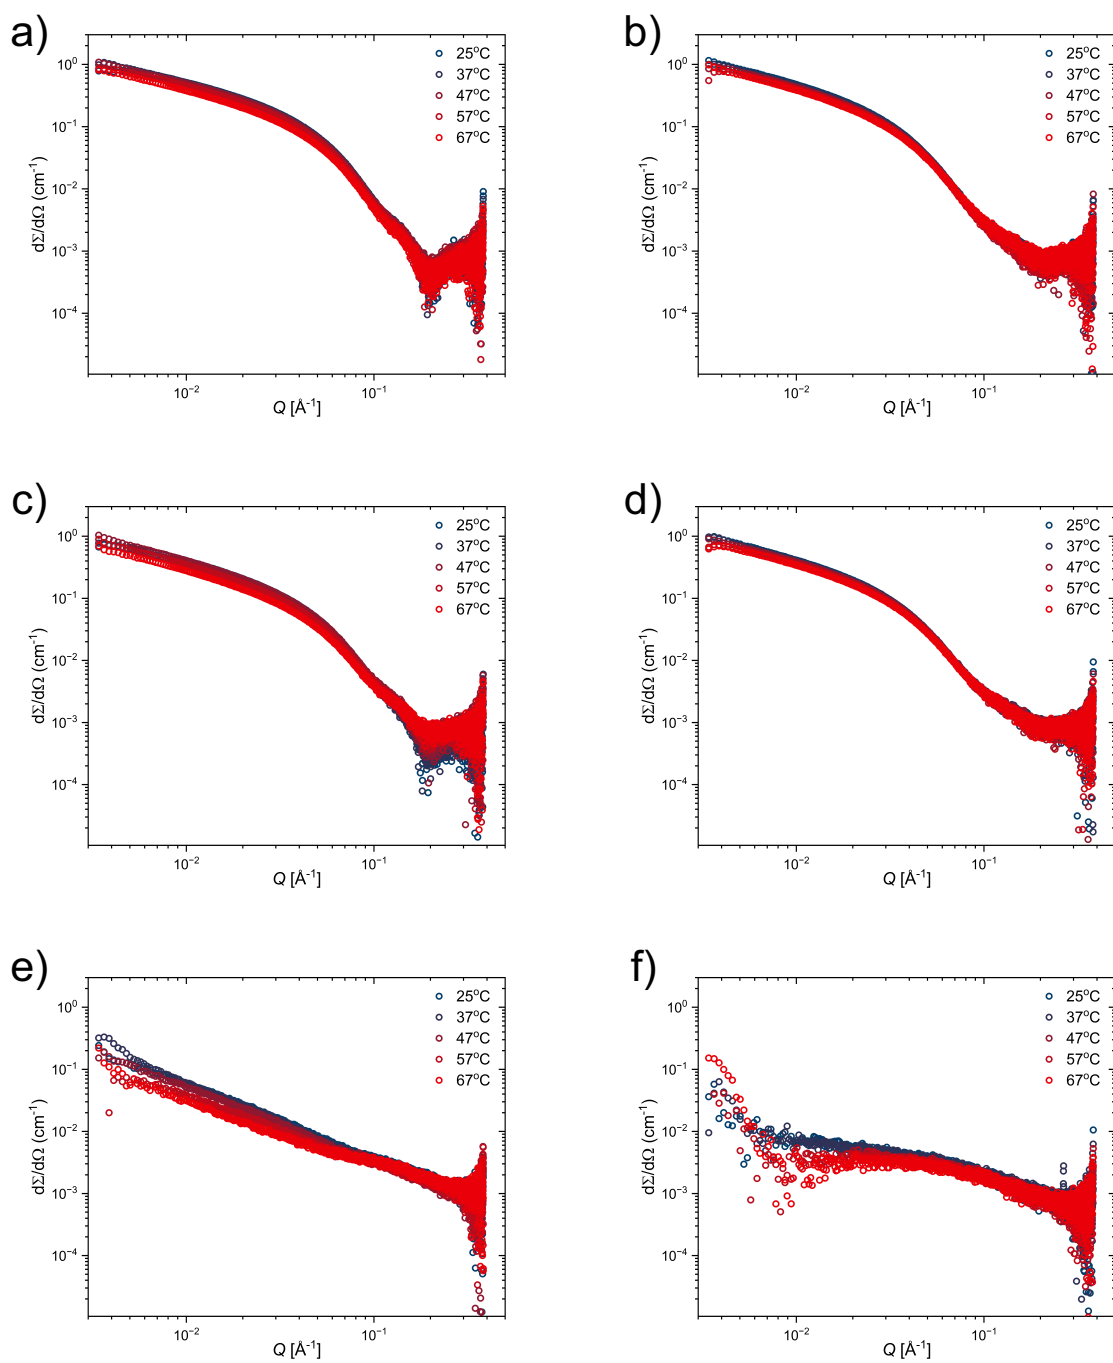

FIG. S7: The scattering data of 5 mg/ml peptide solutions in the range 25 °C - 67 °C, a)  $K_4W(QL)_6K_2$ , b) PEG- $K_4W(QL)_6K_2$ , c)  $K_5W(QL)_6K_2$ , d) PEG- $K_5W(QL)_6K_2$ , e)  $W(QL)_3K_5(QL)_3$ , f) PEG- $W(QL)_3K_5(QL)_3$

## CRY SOL/CRYSON CALCULATED SCATTERING CURVES

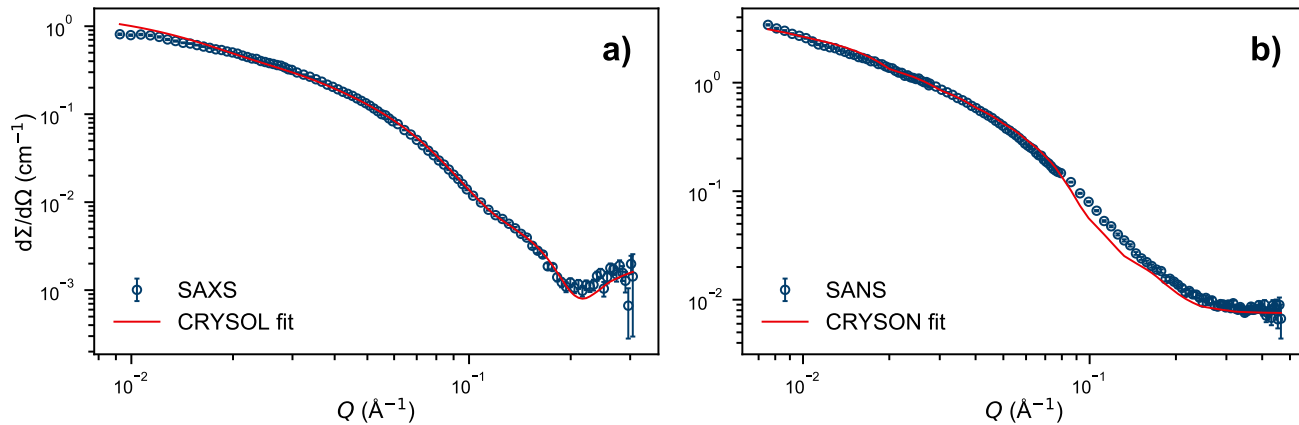

FIG. S8: The scattering data shown in Figure 3a) in the main manuscript, together with curves calculated by CRY SOL and CRYSON based on the simulated  $K_3W(QL)_6K_2$  fiber structure.

## SAXS DATA OF SONICATED SAMPLE

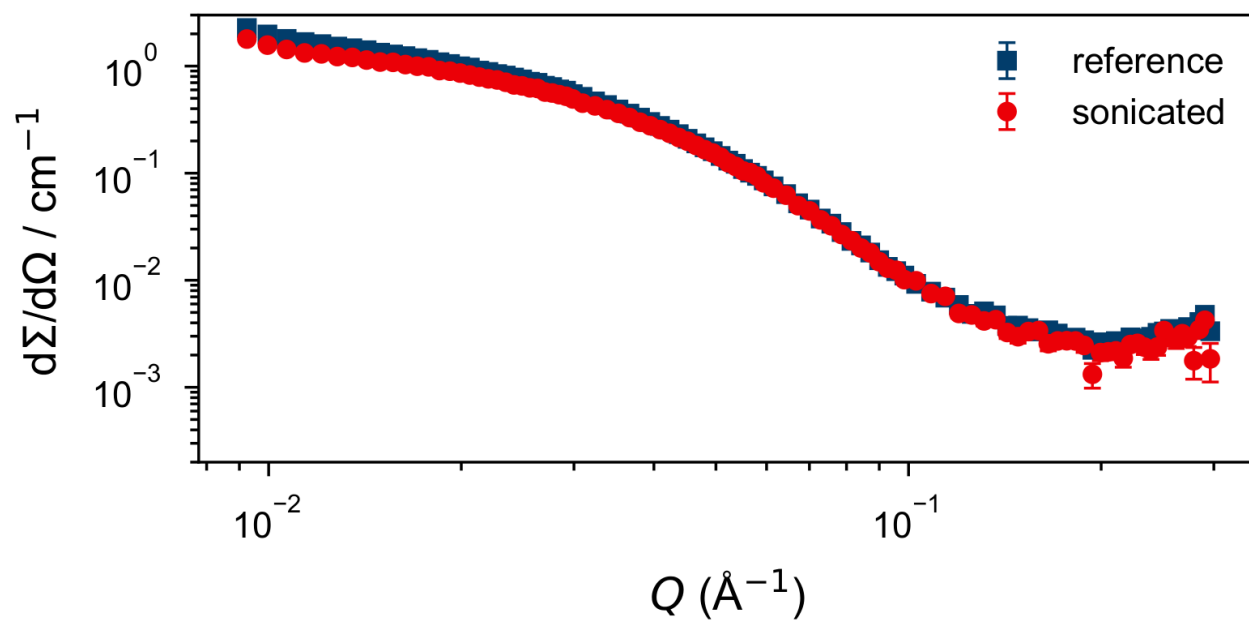

FIG. S9: SAXS data of an untreated 1:1 reference mixture of hPEG-K<sub>3</sub>W(QL)<sub>6</sub>K<sub>2</sub> and dPEG-K<sub>3</sub>W(QL)<sub>6</sub>K<sub>2</sub> in 56vol% D<sub>2</sub>O together with the sonicated sample. Sonication did not destroy the peptide fibers. The slightly lower forward scattering may indicate somewhat shorter fibers.
